# Supplementary material
Source: Royal Society of Chemistry journal article supplement (doi:10.1039/d6sm00321d)
Supplement: d6sm00321d1.pdf [file d6sm00321d1.pdf]

## Supporting Information

### **Translational diffusion and isomerization reaction of a liquid crystal molecule at solid-liquid interface of ionic liquids studied by total internal reflection-transient grating spectroscopy**

Masaki Fujiwara,<sup>a</sup> Hideaki Shirota,<sup>b</sup> Kento Kasahara,<sup>c</sup> Nobuyuki Matubayasi,<sup>c</sup> and Yoshifumi Kimura<sup>\*a</sup>

a: *Graduate School of Science, Doshisha University, Kyotanabe, Kyoto 610-0321, Japan.*

b: *Department of Chemistry, Chiba University, Inage, Chiba 263-8522, Japan.*

c: *Graduate School of Engineering Science, The University of Osaka, Toyonaka, Osaka 560-8531, Japan.*

\*: Corresponding Author.

Table S1. The diffusion coefficients of MBBA in the bulk phase K together with the values of density  $\rho$  and viscosity  $\eta$ . The standard deviation of viscosity is less than 4 % of the value.

| Sample              | $\rho / \text{g cm}^{-3}$ | $D^{(b)} / 10^{-11} \text{ m}^2 \text{ s}^{-1}$ | $\eta / \text{mPa s}$ |
|---------------------|---------------------------|-------------------------------------------------|-----------------------|
| IL <sub>3</sub> LC  | - <sup>a)</sup>           | $3.4 \pm 0.1$                                   | 52                    |
| IL <sub>4</sub> LC  | 1.341                     | $3.4 \pm 0.1$                                   | 65                    |
| IL <sub>6</sub> LC  | - <sup>a)</sup>           | $4.6 \pm 0.1$                                   | 76                    |
| IL <sub>8</sub> LC  | 1.253                     | $3.6 \pm 0.1$                                   | 103                   |
| IL <sub>10</sub> LC | - <sup>a)</sup>           | $2.4 \pm 0.1$                                   | 115                   |
| IL <sub>12</sub> LC | 1.198                     | $2.3 \pm 0.0$                                   | 146                   |

a) not measured.

Table S2. The diffusion coefficients and reaction rates of MBBA near the interface together with the refractive index  $n_D$  and the water contamination after the TIR-TG measurements. The standard deviation of refractive index is approximately 0.02% of the value.

| Sample              | $D^{(i)} / 10^{-11} \text{ m}^2 \text{ s}^{-1}$ | $k_{\text{ct}}^{(i)} / \text{s}^{-1}$ | $n_D$           | water content / ppm |
|---------------------|-------------------------------------------------|---------------------------------------|-----------------|---------------------|
| IL <sub>4</sub> LC  | $3.4 \pm 0.1$                                   | $11.5 \pm 0.5$                        | 1.46            | 610                 |
| IL <sub>6</sub> LC  | $4.2 \pm 0.2$                                   | $5.9 \pm 1.3$                         | - <sup>a)</sup> | 300                 |
| IL <sub>8</sub> LC  | $3.9 \pm 0.1$                                   | $6.0 \pm 0.6$                         | 1.46            | 570                 |
| IL <sub>12</sub> LC | $2.3 \pm 0.1$                                   | $12.5 \pm 0.4$                        | 1.47            | 410                 |

a) not measured.

Table S3. The surface tension  $\gamma$  and contact angle  $\theta_c$  on sapphire for IL<sub>n</sub>LCs, ILs, and MBBA.

| Sample                                   | $\gamma / \text{mN m}^{-1}$ | $\theta_c / \text{degree}$ |
|------------------------------------------|-----------------------------|----------------------------|
| IL <sub>4</sub> LC                       | $33.3 \pm 0.1$              | $11.8 \pm 1.4$             |
| IL <sub>8</sub> LC                       | $32.1 \pm 0.1$              | $8.0 \pm 0.4$              |
| IL <sub>12</sub> LC                      | $31.8 \pm 0.1$              | $7.2 \pm 0.4$              |
| [C <sub>4</sub> mim][NTf <sub>2</sub> ]  | $33.2^{\text{a)}$           | $15.7 \pm 1.6$             |
| [C <sub>8</sub> mim][NTf <sub>2</sub> ]  | $31.4^{\text{a)}$           | $10.3 \pm 1.8$             |
| [C <sub>12</sub> mim][NTf <sub>2</sub> ] | $28.1^{\text{b)}$           | $8.8 \pm 0.8$              |
| MBBA                                     | $34.3 \pm 0.1$              | $6.8 \pm 1.0$              |

a) Taken from ref. 1)

b) Taken from ref. 2)

Table S4. Number of cation, anion, and MBBA in the MD simulation.

| System              | Cation | Anion | MBBA |
|---------------------|--------|-------|------|
| IL <sub>4</sub> LC  | 1600   | 1600  | 400  |
| IL <sub>8</sub> LC  | 1400   | 1400  | 350  |
| IL <sub>12</sub> LC | 1200   | 1200  | 300  |

Table S5. Density calculated by MD simulation  $\rho^{(\text{calc})}$  and relative deviation from the experimental value  $\Delta\rho$ .

| System              | $\rho^{(\text{calc})} / \text{g cm}^{-3}$ | $\Delta\rho / \%$ |
|---------------------|-------------------------------------------|-------------------|
| IL <sub>4</sub> LC  | $1.395 \pm 0.002$                         | +4.0              |
| IL <sub>8</sub> LC  | $1.307 \pm 0.002$                         | +4.3              |
| IL <sub>12</sub> LC | $1.250 \pm 0.003$                         | +4.3              |

Table S6 Diffusion coefficients calculated by MD simulation  $D^{(\text{calc})}$  and corrected diffusion coefficient of MBBA  $D_{\text{MBBA}}^{(\text{corr})}$  according to ref. 3).

|                                                                           | IL <sub>4</sub> LC | IL <sub>8</sub> LC | IL <sub>12</sub> LC |
|---------------------------------------------------------------------------|--------------------|--------------------|---------------------|
| $D_{\text{MBBA}}^{(\text{calc})} / 10^{-12} \text{ m}^2 \text{ s}^{-1}$   | $8.8 \pm 0.1$      | $4.0 \pm 0.1$      | $1.6 \pm 0.1$       |
| $D_{\text{cation}}^{(\text{calc})} / 10^{-12} \text{ m}^2 \text{ s}^{-1}$ | $11 \pm 0$         | $2.9 \pm 0.0$      | $0.84 \pm 0.04$     |
| $D_{\text{anion}}^{(\text{calc})} / 10^{-12} \text{ m}^2 \text{ s}^{-1}$  | $8.0 \pm 0.1$      | $2.9 \pm 0.1$      | $0.99 \pm 0.03$     |
| $D_{\text{MBBA}}^{(\text{corr})} / 10^{-12} \text{ m}^2 \text{ s}^{-1}$   | 9.8                | 4.6                | 2.0                 |

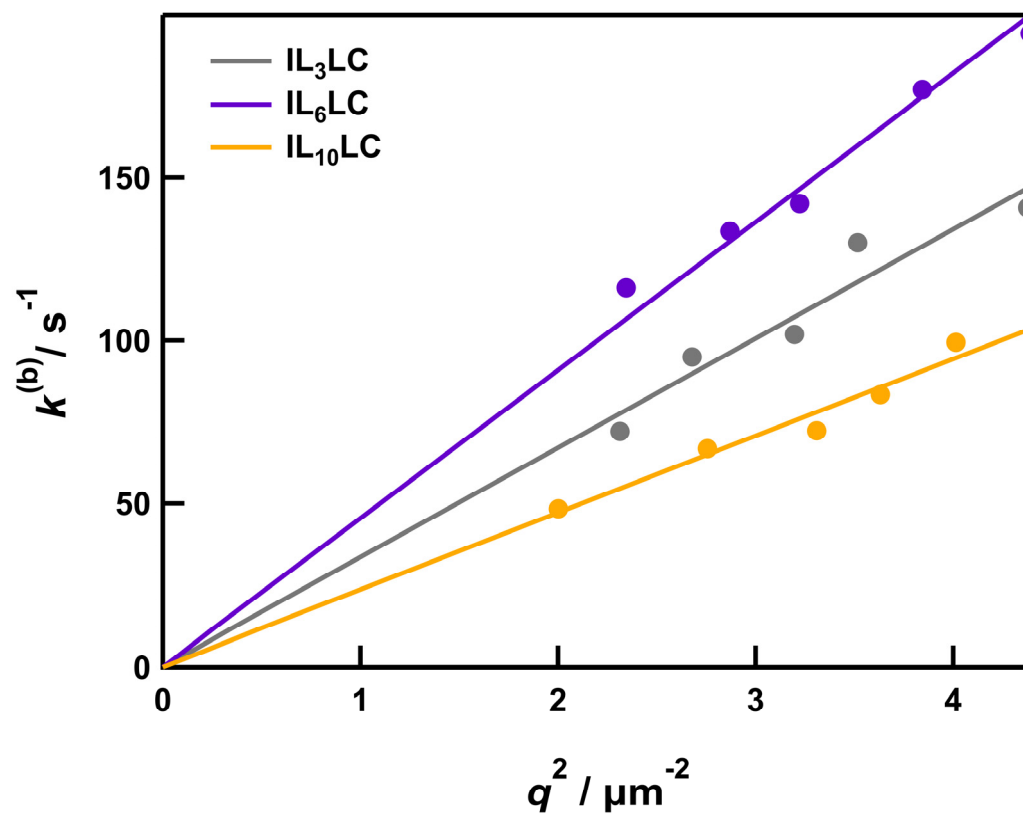

Fig. S1. Plot of the decay rate constants  $k^{(b)}$  against  $q^2$  for IL<sub>n</sub>LC (n = 3, 6, and 10).

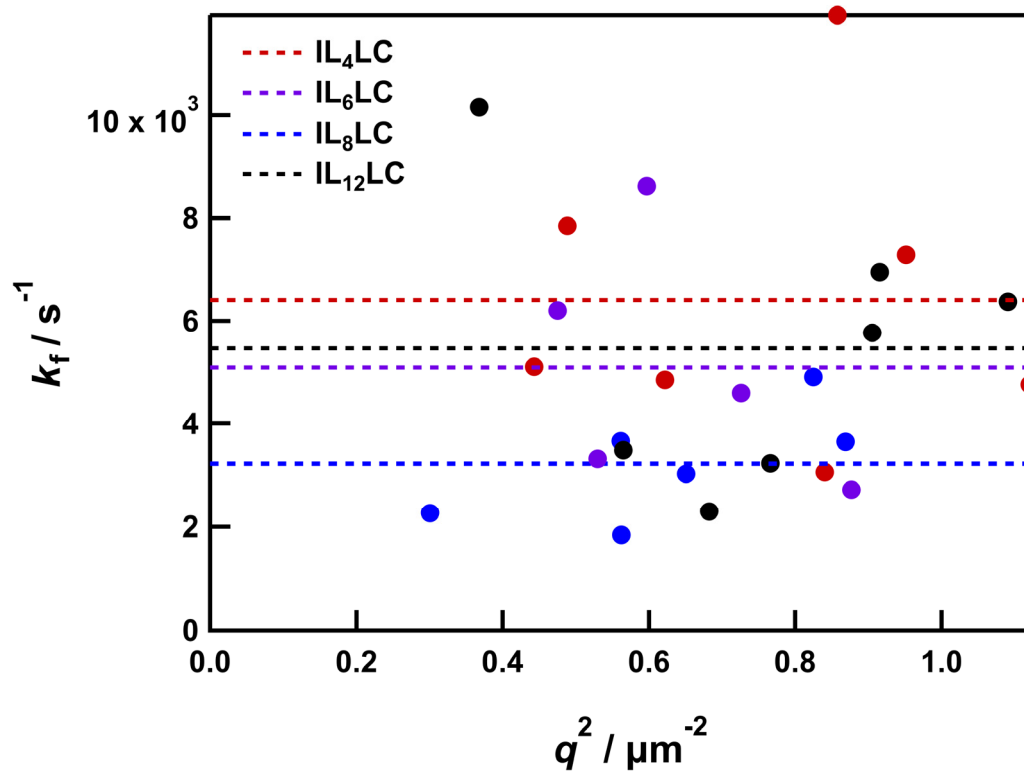

Fig. S2. Plot of the decay rate constants  $k_f$  against  $q^2$  for each  $IL_nLC$ .

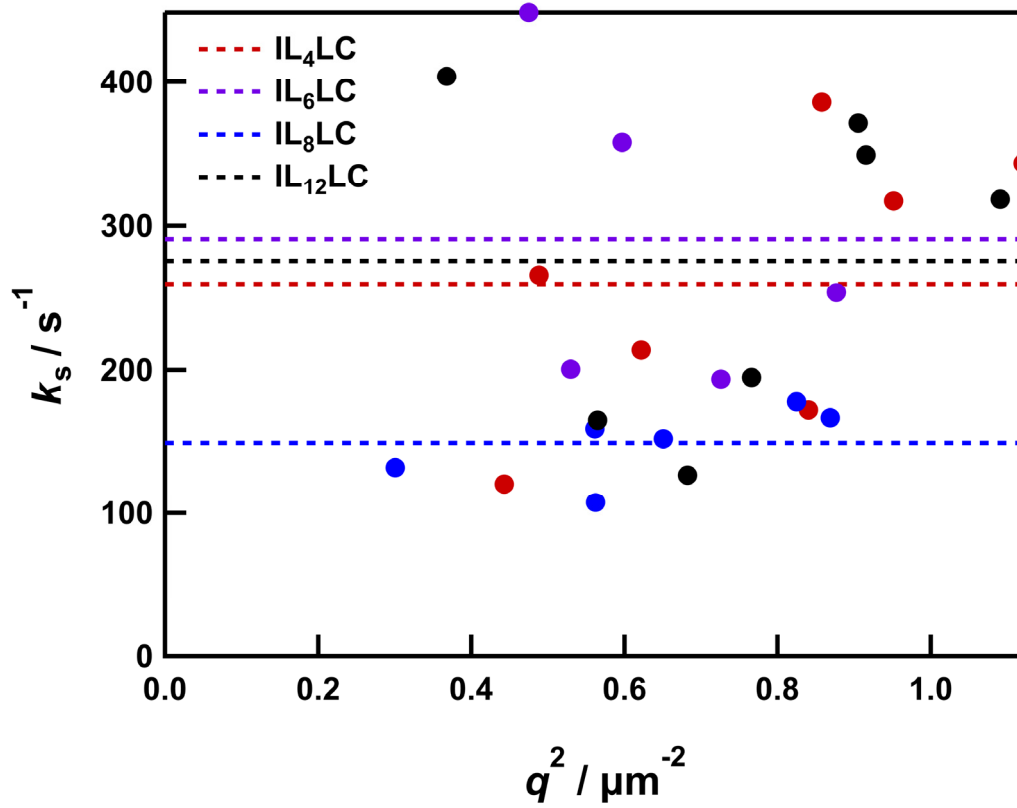

Fig. S3. Plot of the decay rate constants  $k_s$  against  $q^2$  for each  $IL_nLC$ .

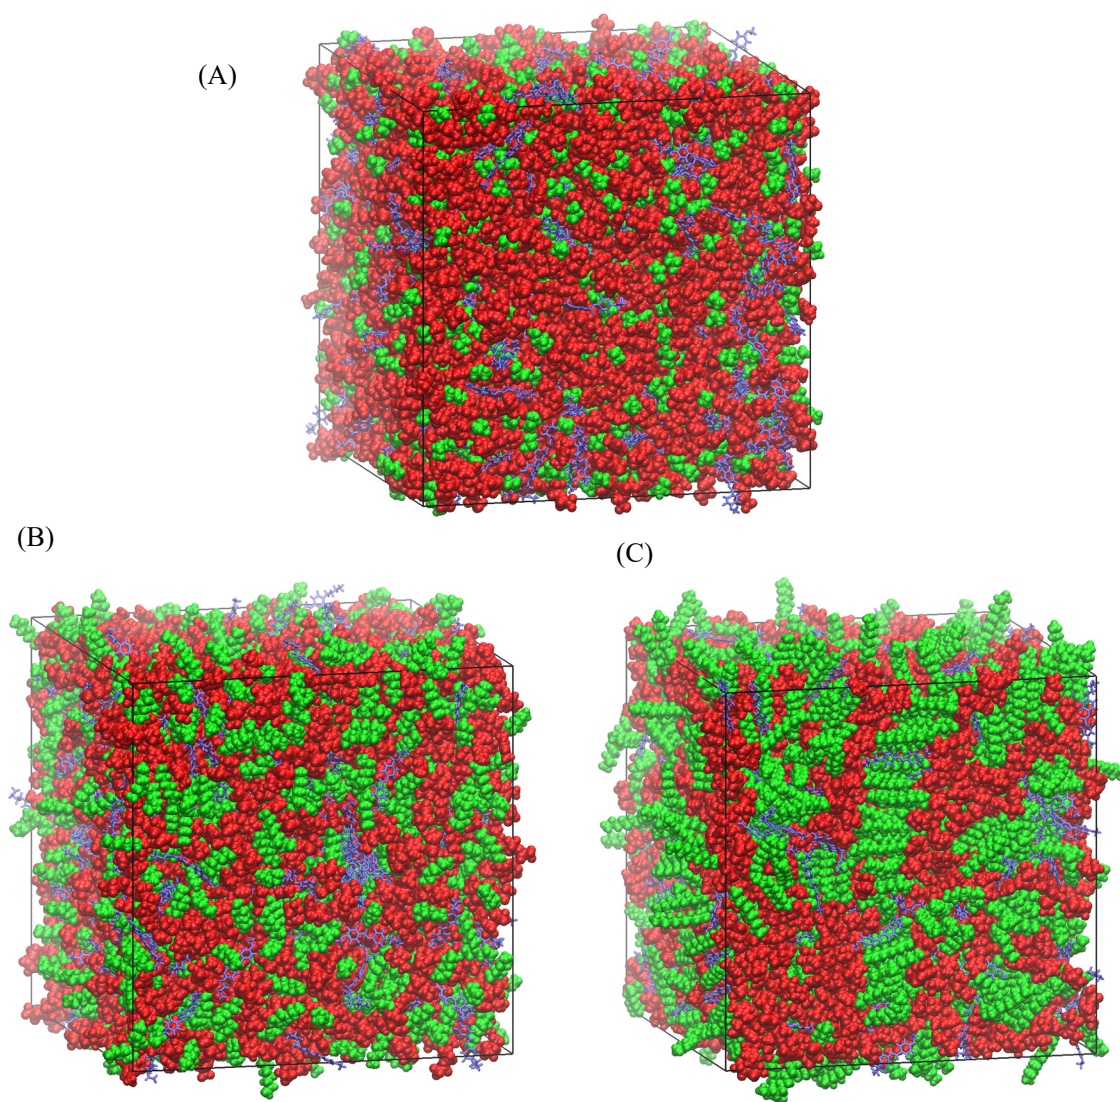

Fig. S4. Snapshots of (A) IL<sub>4</sub>LC, (B) IL<sub>8</sub>LC, and (C) IL<sub>12</sub>LC. Polar and nonpolar domains are colored red and green, and MBBA is colored blue. The box size was 9.75 nm for IL<sub>4</sub>LC, 9.82 nm for IL<sub>8</sub>LC, and 9.84 nm for IL<sub>12</sub>LC.

## References

- 1) M. B. Oliveira, M. Domínguez-Pérez, M. G. Freire, F. Llovell, O. Cabeza, J. A. Lopesda-Silva, L. F. Vega, J. A. P. *J. Phys. Chem. B*, 2012, **116**, 12133–12141.
- 2) N. Hazrati, M. Abdouss, A. A. Miran Beigi, A. A. Pasban, M. Rezaei, *J. Chem. Eng. Data*, 2017, **62**, 3084–3094.
- 3) I. Yeh, G. Hummer, *J. Phys. Chem. B*, 2004, **108**, 15873-15879.
